# Supplementary material
Source: Springer Nature journal article supplement (https://www.springermedizin.de/resource/supplementary/40169_2012_37_MOESM3_ESM.pdf/9675460)

# Patient Biomarker Profiles

DNA

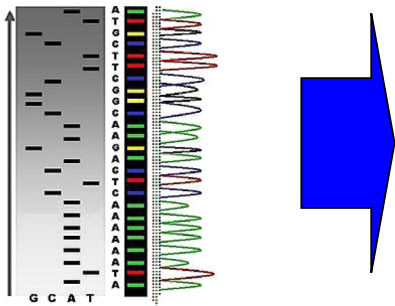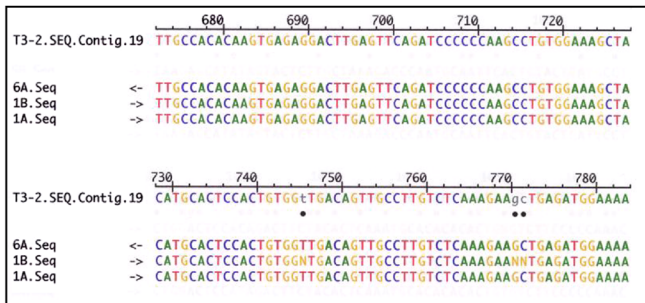

p:\proteo\_data\1\case\ccs\cs01\_01285

2004/11/08 17:23:10

SC1285B

RT: 5.00 - 75.00

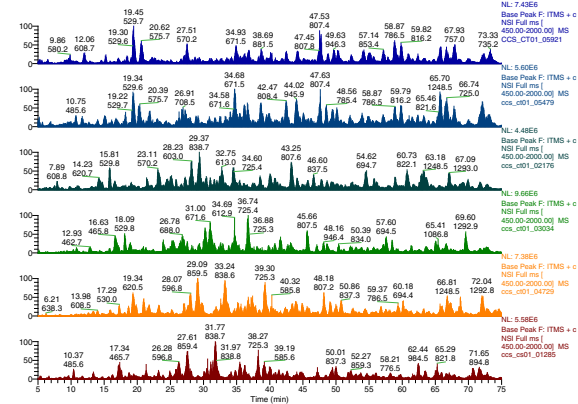

From 50,000  
 protein seq.  
 to 28  
 candidates

Protein

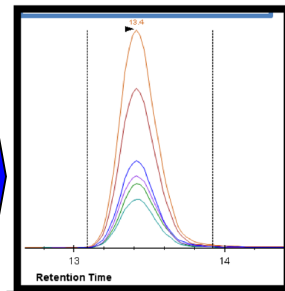

Supplement: MOESM3 [file 9675460]
